# Supplementary material for: Mixed hemi/ad-micelle SDS-coated magnetic Fe2−xAlxO3 (x = 0.4) nanoparticles for the capture of gatifloxacin and prulifloxacin coupled with fluorimetric determination
Source: Royal Society of Chemistry journal article supplement (doi:10.1039/c5ay03285g), 2016-01-01

**Supplementary materials**

**Mixed hemi/ad-micelle SDS-coated magnetic  $\text{Fe}_{2-x}\text{Al}_x\text{O}_3$  ( $x=0.4$ ) nanoparticles for the capture of gatifloxacin and prulifloxacin coupled with fluorimetric determination**

Juanli Du, Hao Wu\*, Yu An, Yating Shi, Xiaozhen Guo, Liming Du\*

School of Chemistry and Material Science, Shanxi Normal University, Shanxi Linfen, P.R.

China 041004

\*Corresponding author: Hao Wu

School of Chemistry and Material Science, Shanxi Normal University, Shanxi Linfen, P.R.

China 041004

Tel.: +86 357 2057969

Fax: +86 357 2057969

E-mail: [fxcszx@163.com](mailto:fxcszx@163.com)

\*Corresponding author: Liming Du

School of Chemistry and Material Science, Shanxi Normal University, Shanxi Linfen, P.R.

China 041004

Tel.: +86 357 2057969

Fax: +86 357 2057969

E-mail: [lmd@dns.sxnu.edu.cn](mailto:lmd@dns.sxnu.edu.cn)

## Apparatus

The  $\text{Fe}_3\text{O}_4$  MNPs and  $\text{Fe}_{2-x}\text{Al}_x\text{O}_3$  MNPs structural and morphological characterizations were carried out using Philips PW 3710 X-ray diffractometer with  $\text{CrK}\alpha$  radiation. Transmission electron microscopy (TEM) measurements were carried out using a JEM-2100 at 100 kV machine. The energy dispersive X-ray analysis (EDAX) was investigated by scanning electron microscopy (SEM) coupled with an energy dispersive X-ray spectroscopy unit.

## Characterization of the $\text{Fe}_{2-x}\text{Al}_x\text{O}_3$ MNPs

The adsorbents must possess superparamagnetic properties to achieve rapid separation under a magnetic field. Fig. S1 shows the magnetization curves for the  $\text{Fe}_3\text{O}_4$  MNPs and  $\text{Fe}_{2-x}\text{Al}_x\text{O}_3$  MNPs at room temperature. Both the  $\text{Fe}_3\text{O}_4$  MNPs and  $\text{Fe}_{2-x}\text{Al}_x\text{O}_3$  MNPs exhibit typical superparamagnetic behaviour due to the lack of hysteresis. The large saturation magnetization was  $48.7 \text{ emu}\cdot\text{g}^{-1}$  for the  $\text{Fe}_{2-x}\text{Al}_x\text{O}_3$  MNPs and  $70.8 \text{ emu}\cdot\text{g}^{-1}$  for the  $\text{Fe}_3\text{O}_4$  MNPs, which makes them very susceptible to magnetic fields. Fig. S2 shows the SEM image of the  $\text{Fe}_3\text{O}_4$  MNPs and  $\text{Fe}_{2-x}\text{Al}_x\text{O}_3$  MNPs, which illustrates the uniform size distribution of these nanoparticles. The diameter of the  $\text{Fe}_3\text{O}_4$  MNPs was in the 40-50 nm range, and the diameter of the  $\text{Fe}_{2-x}\text{Al}_x\text{O}_3$  MNPs was slightly larger. Therefore, the  $\text{Fe}_{2-x}\text{Al}_x\text{O}_3$  MNPs leads to a decrease in the magnetic strength of  $\text{Fe}_3\text{O}_4$  MNPs and an increase in the particle diameter of the  $\text{Fe}_3\text{O}_4$  MNPs.

The crystal phases of  $\text{Fe}_3\text{O}_4$  MNPs  $\text{Al}_2\text{O}_3$  and  $\text{Fe}_{2-x}\text{Al}_x\text{O}_3$  MNPs were compared using XRD, and the obtained XRD patterns are shown in Fig. S3. The diffraction pattern is in good agreement with the JCPDS file for  $\text{Fe}_3\text{O}_4$ , which indicated that the  $\text{Fe}_3\text{O}_4$  nanoparticles are well cubic-crystals. For the  $\text{Fe}_{2-x}\text{Al}_x\text{O}_3$  MNPs, a clear broad peak (at  $45.7^\circ$ ,  $70.2^\circ$  and  $73.6^\circ$ )

corresponding to  $\text{Fe}_3\text{O}_4$  can be observed. The results strongly suggest that Al was successfully doped into the  $\text{Fe}_3\text{O}_4$  MNPs. The compositional analysis of the  $\text{Fe}_{2-x}\text{Al}_x\text{O}_3$  MNPs was carried out with the aid of EDAX, which is shown in Fig. S4. Based on this study, the prepared MNPs are composites of Al, Fe and O.

Fig. S1 VSM magnetization curves of  $\text{Fe}_3\text{O}_4$  MNPs and  $\text{Fe}_{2-x}\text{Al}_x\text{O}_3$  MNPs.

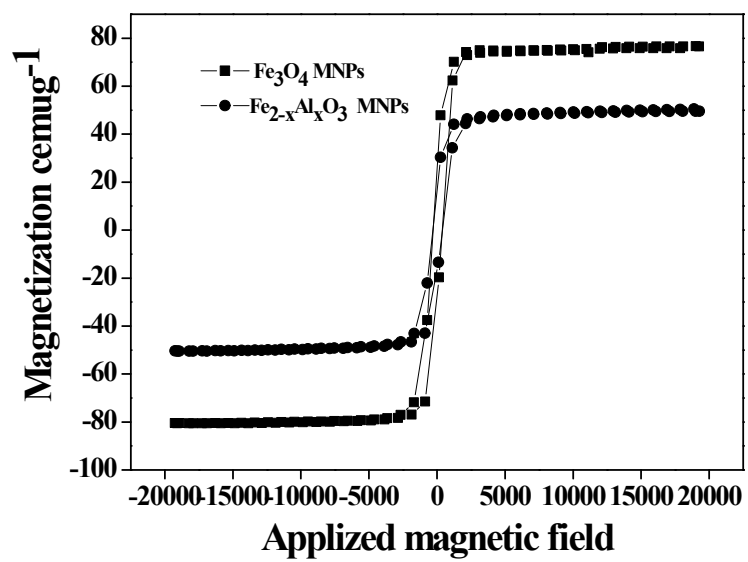

Fig. S2 SEM image of (a)  $\text{Fe}_3\text{O}_4$  MNPs and (b)  $\text{Fe}_{2-x}\text{Al}_x\text{O}_3$  MNPs.

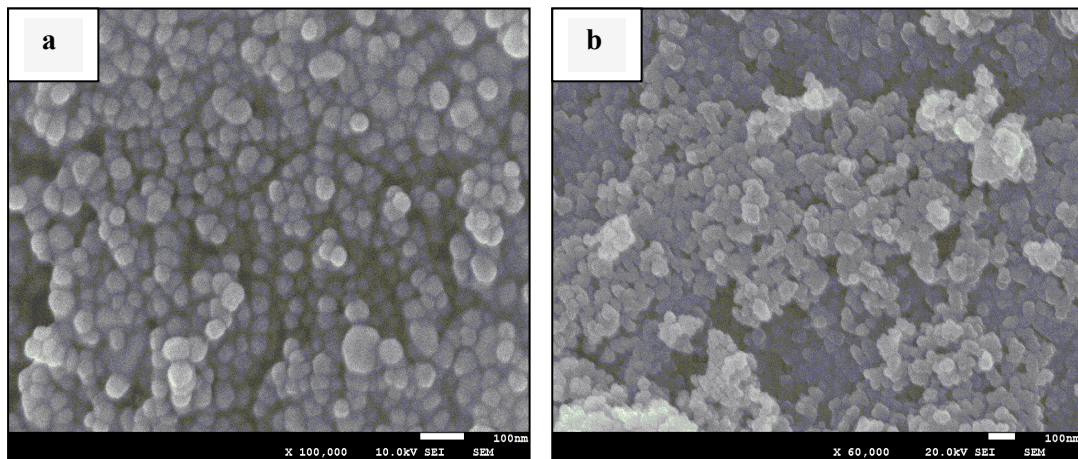

Fig. S3 XRD patterns of  $\text{Fe}_3\text{O}_4$  MNPs and  $\text{Fe}_{2-x}\text{Al}_x\text{O}_3$  MNPs.

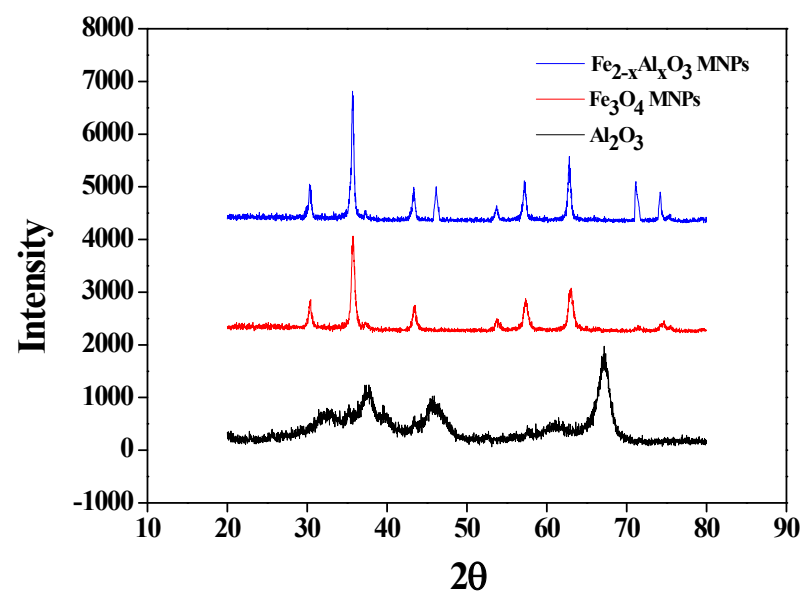

Fig. S4 EDAX spectrum of  $\text{Fe}_{2-x}\text{Al}_x\text{O}_3$  MNPs.

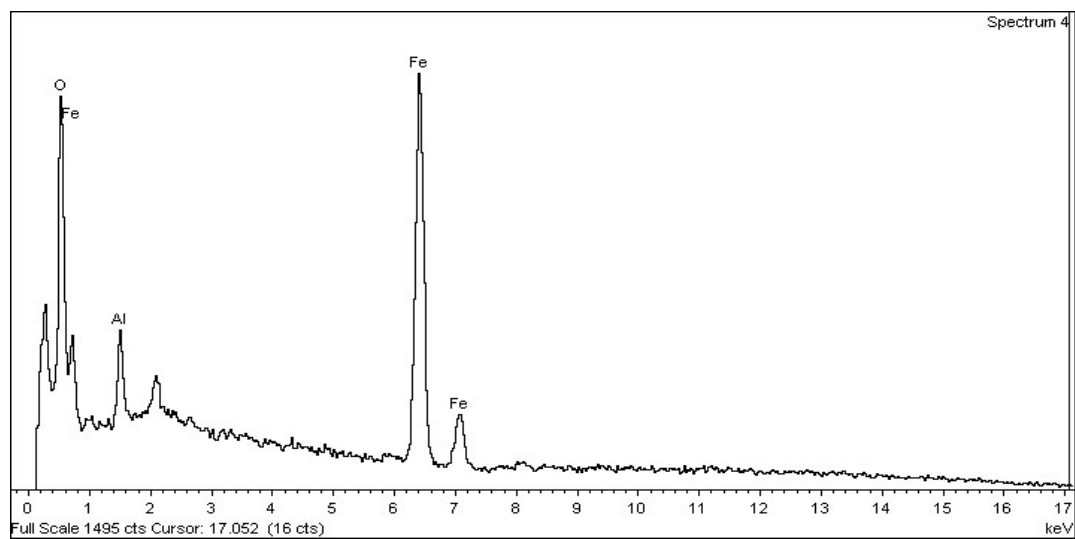

Fig. S5 Comparison of  $\text{Fe}_3\text{O}_4$  MNPs and  $\text{Fe}_{2-x}\text{Al}_x\text{O}_3$  MNPs. The extraction efficiency of  $\text{Fe}_{2-x}\text{Al}_x\text{O}_3$  MNPs was better than that of  $\text{Fe}_3\text{O}_4$  MNPs.

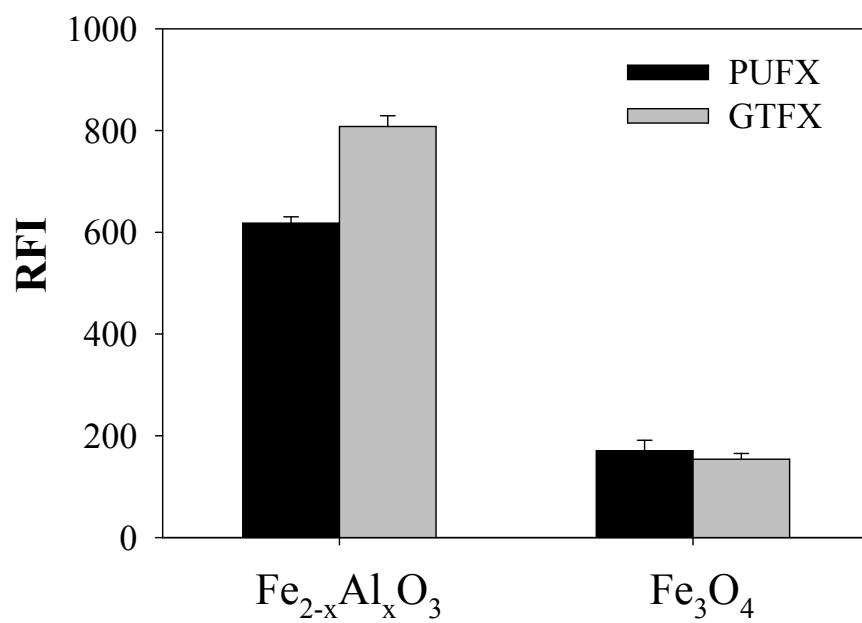



Fig. S6 Effect of the amount of NaCl. The amount of  $\text{Fe}_{2-x}\text{Al}_x\text{O}_3$  MNPs was 8 mg or 15 mg, and 0.05-0.3 g of NaCl were added. Extraction conditions: SDS concentration,  $40 \text{ mg}\cdot\text{mL}^{-1}$ , extraction time, 8 min, desorption solvent volume 0.5 mL, desorption time, 7 min, sample pH 5.0 for GTFX and PUFX.

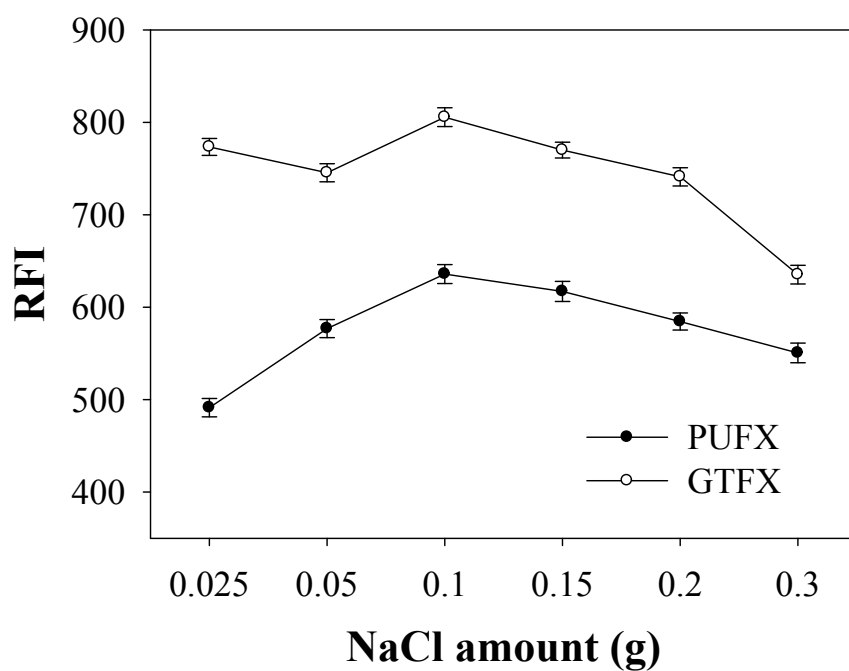

Supplement: c5ay03285g1.pdf [file c5ay03285g1.pdf]
